# Supplementary material
Source: ML conference proceedings conference paper supplement (https://openaccess.thecvf.com/content/CVPR_2019/html/Wang_Fast_Online_Object_CVPR_2019_paper.html)
Supplement: Supplementary file 1 [file Wang_Fast_Online_Object_CVPR_2019_supplemental.pdf]

# Supplementary Material for Fast Online Object Tracking and Segmentation: A Unifying Approach

Qiang Wang\*  
CASIA

qiang.wang@nlpr.ia.ac.cn

Li Zhang\*  
University of Oxford

lz@robots.ox.ac.uk

Luca Bertinetto\*  
Five AI

luca.bertinetto@five.ai

Weiming Hu  
CASIA

wmhu@nlpr.ia.ac.cn

Philip H.S. Torr  
University of Oxford

philip.torr@eng.ox.ac.uk

## 1. Network architecture details

**Network backbone.** Table 1 illustrates the details of our *backbone* architecture ( $f_\theta$  in the main paper). For both variants, we use a ResNet-50 [2] until the final convolutional layer of the 4-th stage. In order to obtain a higher spatial resolution in deep layers, we reduce the output stride to 8 by using convolutions with stride 1. Moreover, we increase the receptive field by using dilated convolutions [1]. Specifically, we set the stride to 1 and the dilation rate to 2 in the  $3 \times 3$  conv layer of `conv4_1`. Differently to the original ResNet-50, there is no downsampling in `conv4_x`. We also add to the backbone an *adjust* layer (a  $1 \times 1$  convolutional layer with 256 output channels). Exemplar and search patches share the network’s parameters from `conv1` to `conv4_x`, while the parameters of the *adjust* layer are not shared. The output features of the *adjust* layer are then depth-wise cross-correlated, resulting a feature map of size  $17 \times 17$ .

**Network heads.** The network architecture of the branches of both variants are shown in Table 2 and 3. The `conv5` block in both variants contains a normalisation layer and ReLU non-linearity while `conv6` only consists of a  $1 \times 1$  convolutional layer.

**Mask refinement module.** With the aim of producing a more accurate object mask, we follow the strategy of [5], which merges low and high resolution features using multiple *refinement* modules made of upsampling layers and skip connections. Figure 1 illustrates how a mask is generated with stacked refinement modules. Figure 2 gives an example of refinement module  $U_3$ .

| <i>block</i>         | <i>exemplar</i> output size | <i>search</i> output size | <i>backbone</i>                                                                                                                 |
|----------------------|-----------------------------|---------------------------|---------------------------------------------------------------------------------------------------------------------------------|
| <code>conv1</code>   | $61 \times 61$              | $125 \times 125$          | $7 \times 7$ , 64, stride 2                                                                                                     |
| <code>conv2_x</code> | $31 \times 31$              | $63 \times 63$            | $3 \times 3$ max pool, stride 2<br>$\begin{bmatrix} 1 \times 1, 64 \\ 3 \times 3, 64 \\ 1 \times 1, 256 \end{bmatrix} \times 3$ |
| <code>conv3_x</code> | $15 \times 15$              | $31 \times 31$            | $\begin{bmatrix} 1 \times 1, 128 \\ 3 \times 3, 128 \\ 1 \times 1, 512 \end{bmatrix} \times 4$                                  |
| <code>conv4_x</code> | $15 \times 15$              | $31 \times 31$            | $\begin{bmatrix} 1 \times 1, 256 \\ 3 \times 3, 256 \\ 1 \times 1, 1024 \end{bmatrix} \times 6$                                 |
| <i>adjust</i>        | $15 \times 15$              | $31 \times 31$            | $1 \times 1$ , 256                                                                                                              |
| <i>xcorr</i>         | $17 \times 17$              |                           | depth-wise                                                                                                                      |

Table 1: Backbone architecture. Details of each building block are shown in square brackets.

| <i>block</i>       | score               | box                 | mask                            |
|--------------------|---------------------|---------------------|---------------------------------|
| <code>conv5</code> | $1 \times 1$ , 256  | $1 \times 1$ , 256  | $1 \times 1$ , 256              |
| <code>conv6</code> | $1 \times 1$ , $2k$ | $1 \times 1$ , $4k$ | $1 \times 1$ , $(63 \times 63)$ |

Table 2: Architectural details of the *three-branch* head.  $k$  denotes the number of anchor boxes per RoW.

| <i>block</i>       | score              | mask                            |
|--------------------|--------------------|---------------------------------|
| <code>conv5</code> | $1 \times 1$ , 256 | $1 \times 1$ , 256              |
| <code>conv6</code> | $1 \times 1$ , 1   | $1 \times 1$ , $(63 \times 63)$ |

Table 3: Architectural details of the *two-branch* head.

\*Equal contribution. Work done while at University of Oxford.

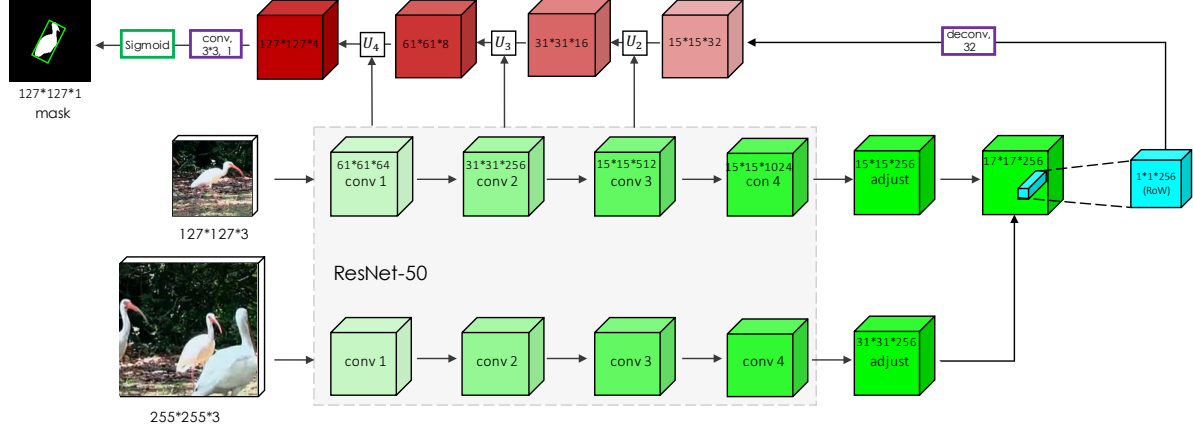

Figure 1: Schematic illustration of mask generation with stacked refinement modules.

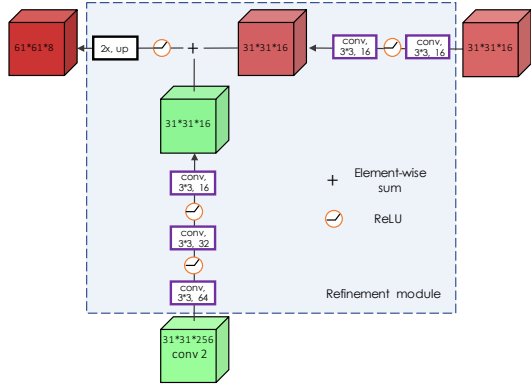

Figure 2: Example of a refinement module  $U_3$ .

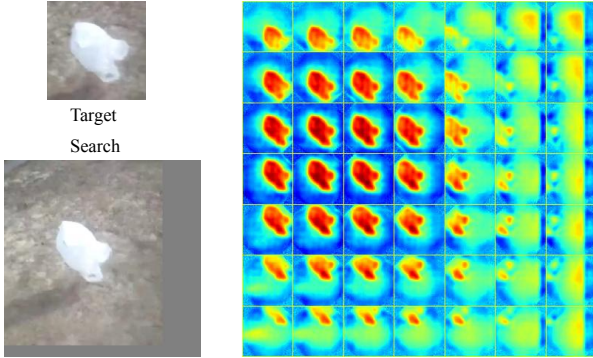

Figure 3: Score maps from Mask branch at different locations.

## 2. Further qualitative results

**Different masks at different locations.** Our model generates a mask for each RoW. During inference, we rely on the

score branch to select the final output mask (using the location attaining the maximum score). The example of Figure 3 illustrates the multiple output masks produced by the mask branch, each corresponding to a different RoW.

**Benchmark sequences.** More qualitative results for VOT and DAVIS sequences are shown in Figure 4 and 5.

## References

- [1] L.-C. Chen, G. Papandreou, I. Kokkinos, K. Murphy, and A. L. Yuille. Deeplab: Semantic image segmentation with deep convolutional nets, atrous convolution, and fully connected crfs. *IEEE Transactions on Pattern Analysis and Machine Intelligence*, 2018.
- [2] K. He, X. Zhang, S. Ren, and J. Sun. Deep residual learning for image recognition. In *IEEE Conference on Computer Vision and Pattern Recognition*, 2016.
- [3] M. Kristan, A. Leonardis, J. Matas, M. Felsberg, R. Pfugfelder, L. C. Zajc, T. Vojir, G. Bhat, A. Lukezic, A. Eldesokey, G. Fernandez, and et al. The sixth visual object tracking vot2018 challenge results. In *European Conference on Computer Vision workshops*, 2018.
- [4] F. Perazzi, J. Pont-Tuset, B. McWilliams, L. Van Gool, M. Gross, and A. Sorkine-Hornung. A benchmark dataset and evaluation methodology for video object segmentation. In *IEEE Conference on Computer Vision and Pattern Recognition*, 2017.
- [5] P. O. Pinheiro, T.-Y. Lin, R. Collobert, and P. Dollár. Learning to refine object segments. In *European Conference on Computer Vision*, 2016.
- [6] J. Pont-Tuset, F. Perazzi, S. Caelles, P. Arbeláez, A. Sorkine-Hornung, and L. Van Gool. The 2017 davis challenge on video object segmentation. *arXiv preprint arXiv:1704.00675*, 2017.

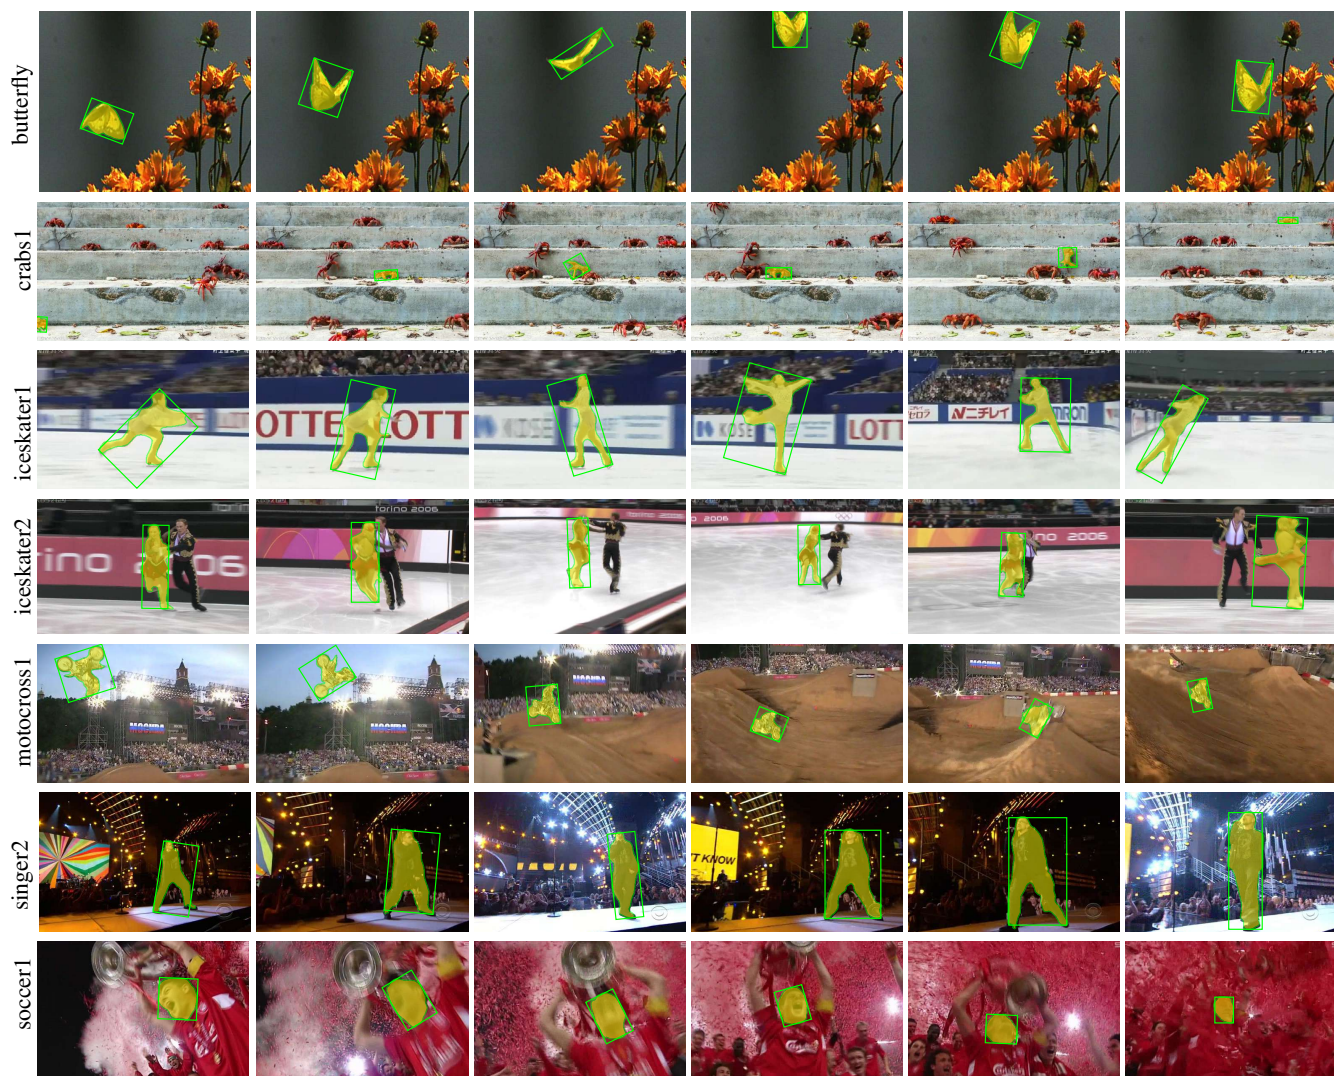

Figure 4: Further qualitative results of our method on sequences from the visual object tracking benchmark VOT-2018 [3].



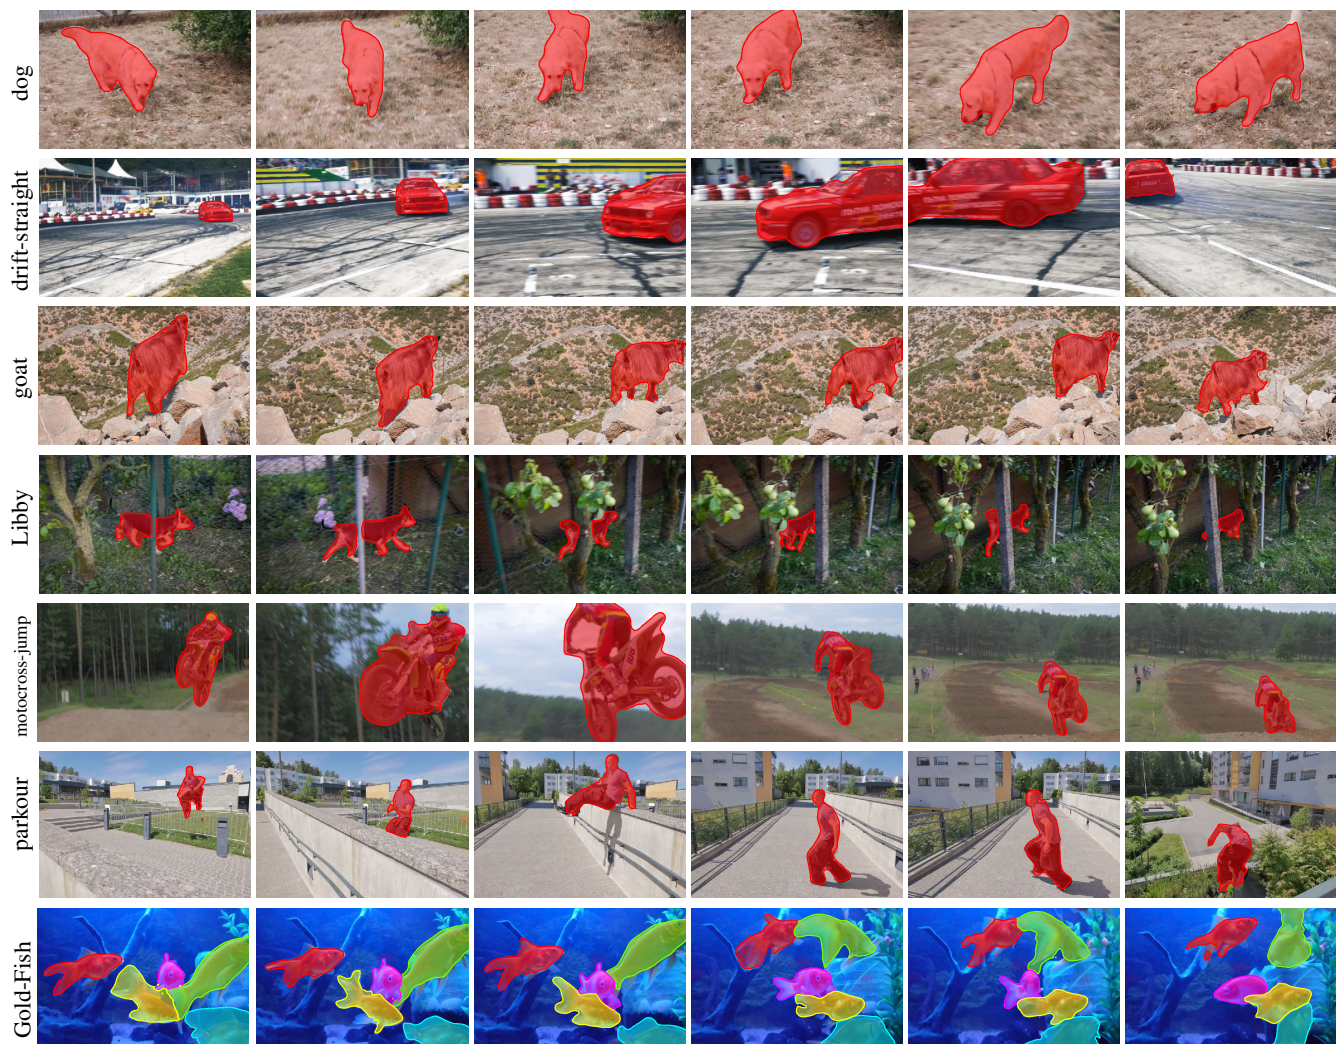

Figure 5: Further qualitative results of our method on sequences from the semi-supervised video object segmentation benchmarks DAVIS-2016 [4] and DAVIS-2017 [6].
